# Supplementary material
Source: PubMed Central journal article supplement (PMC3308767)

**Supplemental Figure 1. Characterization of the A $\beta$  species used in the experiments.**

**A.** ThT assay detected no fibrillar species of A $\beta_{(1-40)}$  at 5  $\mu$ M concentration. However, 5  $\mu$ M A $\beta_{(1-42)}$  had fibrillar species present, even after ultracentrifugation, suggesting a high-propensity for aggregation. **B.** The oligomeric species were separated by size exclusion chromatography and analyzed by western blot analysis of the 50 fractions eluted from the column. The oligomeric size was approximated by co-elution with markers of the known size, and by dividing the molecular weight of the oligomer by the size of the monomeric A $\beta$  peptide.

**Supplemental Figure 2. Four point dose-response curves for selected compounds.**

Neurons were treated with A $\beta$  in the presence of 2.5 nM, 25 nM, 250 nM, and 2.5  $\mu$ M of the indicated compound. These data were used to calculate the an approximate EC50 values in Fig. 2.

**Supplemental Figure 3. COX1 and COX2 inhibitors do not alter neurite length.** Neurons treated with 10  $\mu$ M of the COX1 inhibitor FR122047, or the COX2 inhibitor, CAY10404, did not significantly alter neurite length in the absence of A $\beta_{(1-40)}$ .

**Supplemental Figure 4. Inhibition of A $\beta_{(1-40)}$  and A $\beta_{(1-42)}$  -induced neurite loss by NSAIDs.**

**A.** Representative images A $\beta_{(1-42)}$ -induced neurite loss at 1  $\mu$ M and 5  $\mu$ M concentrations. **B.** Similar to A $\beta_{(1-40)}$ , A $\beta_{(1-42)}$ -elicited reduction of neurite length was markedly attenuated in the presence of 10  $\mu$ M of various NSAIDs (ibuprofen, Ibu; naproxen, Napr; nabumetone, Nabu).

**A**

ThT assay

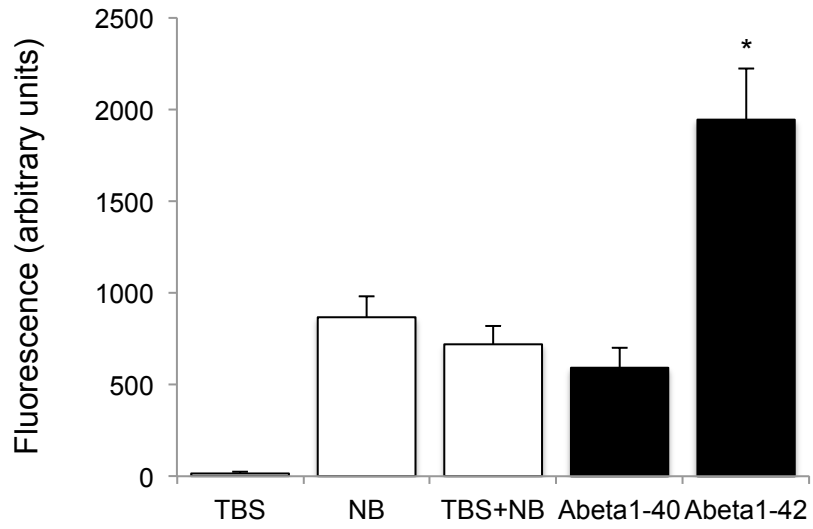**B**

Size-exclusion chromatography

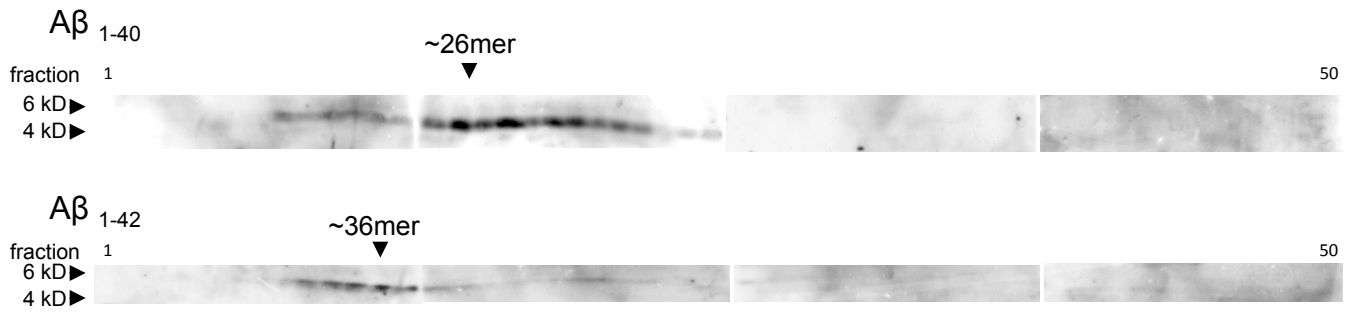

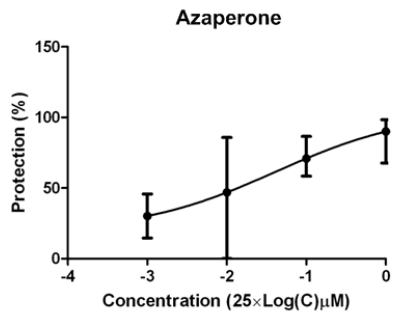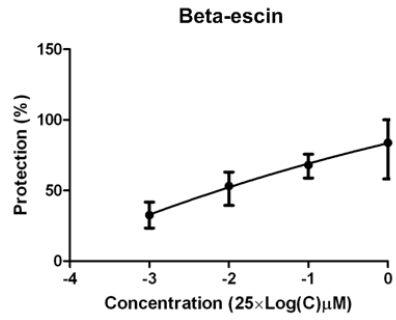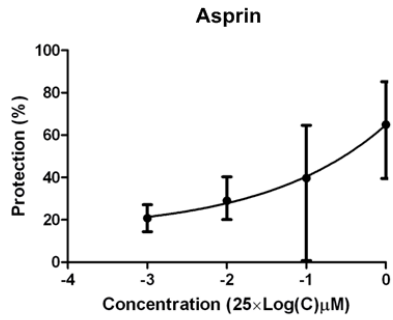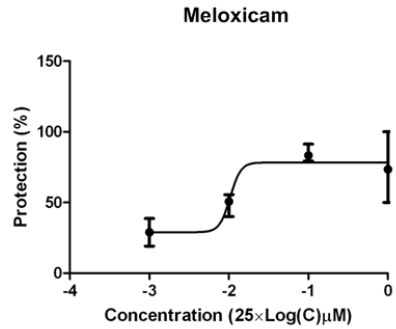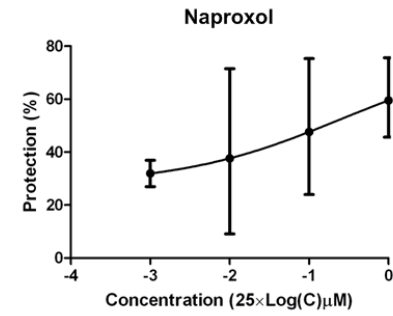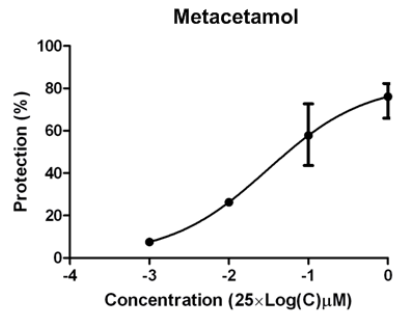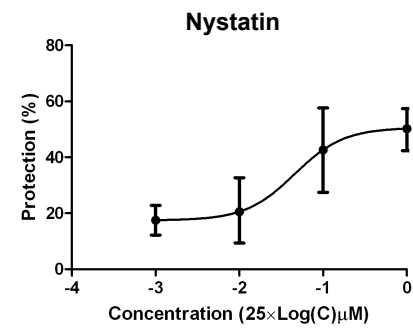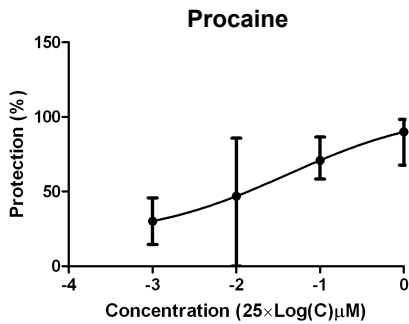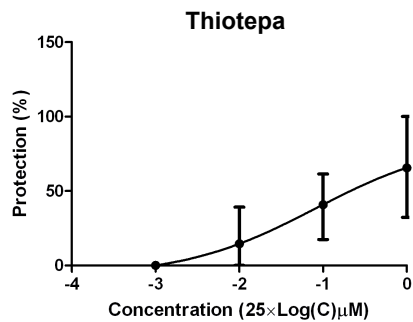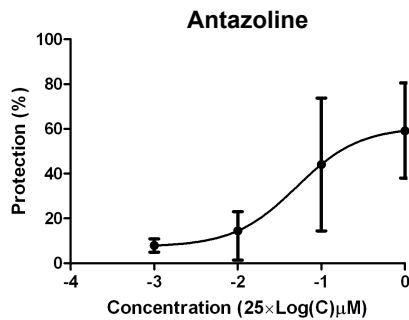

Suppl. Figure 2

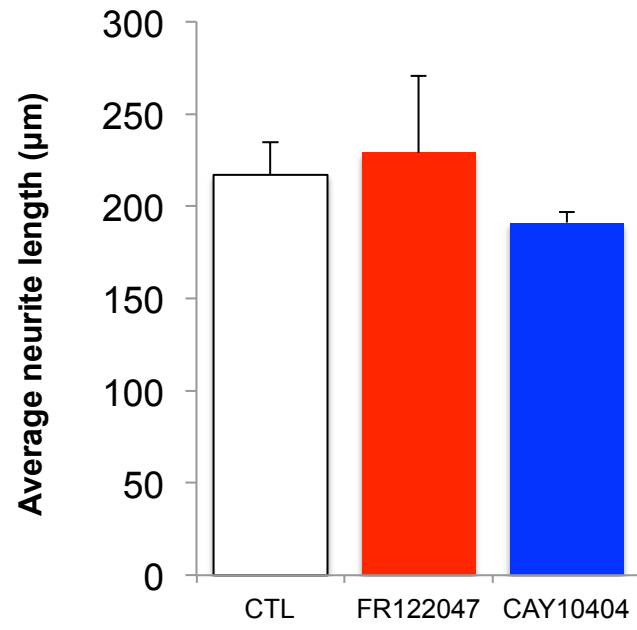

**A**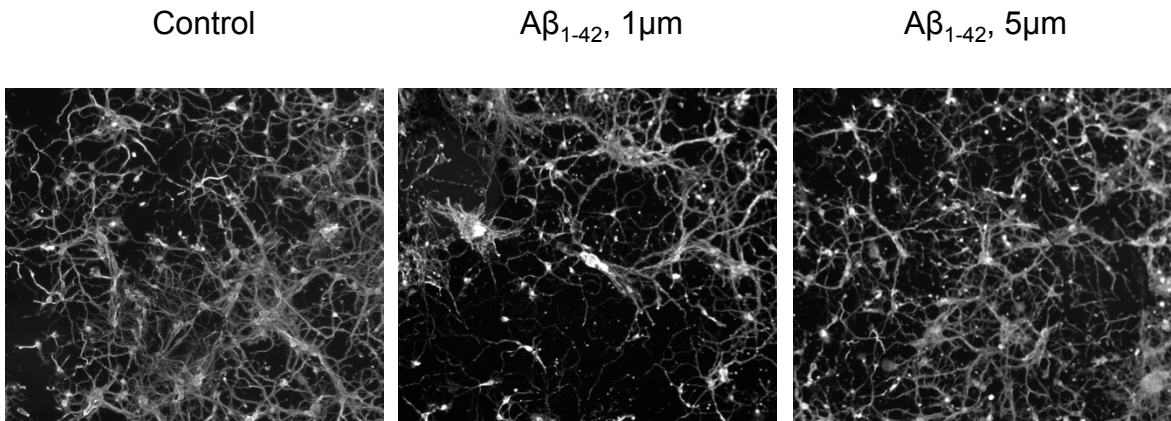**B**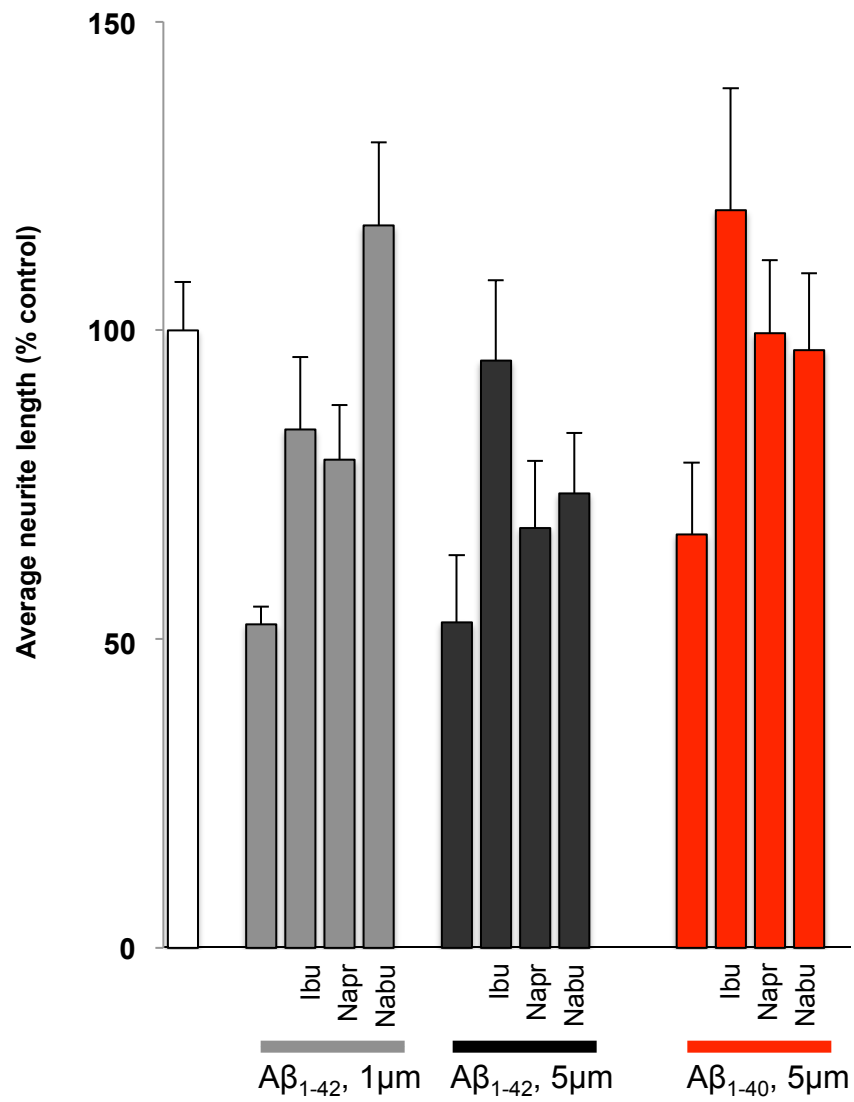

Supplement: supp_M111.290957_jbc.M111.290957-1.pdf [file supp_M111.290957_jbc.M111.290957-1.pdf]
